# Supplementary material for: The effect of defect interactions on the reduction of doped ceria
Source: Royal Society of Chemistry journal article supplement (doi:10.1039/d1cp00925g), 2021-01-01
Supplement: d1cp00925g1.pdf [file d1cp00925g1.pdf]

## Supporting Information

### The Effect of Defect Interactions on the Reductions of Doped Ceria

Steffen Grieshammer<sup>1,2,3</sup>

<sup>1</sup>Institute of Physical Chemistry, RWTH Aachen University, Landoltweg 2, 52056 Aachen, Germany.

<sup>2</sup>Helmholtz-Institut Münster (IEK-12), Forschungszentrum Jülich GmbH, Corrensstr. 46, 48149 Münster, Germany

<sup>3</sup>JARA-HPC, Germany, Forschungszentrum Jülich & RWTH Aachen University, Germany  
grieshammer@pc.rwth-aachen.de

### Mass action law for interacting defects

The change of the Gibbs energy of the doped lattice due to reduction can be expressed as:

$$\Delta G_R = \Delta G_{\text{Ce}'} + \Delta G_V + \Delta G_{\text{O}_2} - k_B T \Delta S_{\text{conf}} + \Delta G_{\text{inter}}$$

This includes:

- The contributions from the formation of polarons, vacancies and oxygen molecules:

$$\Delta G_{\text{Ce}'} = N_{\text{Ce}'} \cdot g_{\text{Ce}'}$$

$$\Delta G_V = N_V \cdot g_V$$

$$\Delta G_{\text{O}_2} = N_{\text{O}_2} \cdot \mu_{\text{O}_2}$$

where  $N_{\text{Ce}'}$ ,  $N_V$ ,  $N_{\text{O}_2}$  are the number of polarons, oxygen vacancies, and oxygen molecules, respectively.

- The ideal configurational entropy with the contributions before and after reduction:

$$\Delta S_{\text{conf}} = \ln \frac{(N_{\text{cation}})!}{(N_{\text{cation}} - N_{\text{Ce}'} - N_{\text{dot}})! N_{\text{Ce}'}! N_{\text{dot}}!} + \ln \frac{(N_{\text{anion}})!}{(N_{\text{anion}} - N_V - N_{\text{V,dot}})! (N_V + N_{\text{V,dot}})!} \\ - \ln \frac{(N_{\text{cation}})!}{(N_{\text{cation}} - N_{\text{dot}})! N_{\text{dot}}!} - \ln \frac{(N_{\text{anion}})!}{(N_{\text{anion}} - N_{\text{V,dot}})! N_{\text{V,dot}}!}$$

Where  $N_{\text{dot}}$  and  $N_{\text{V,dot}}$  are the number of dopant ions on cerium sites and the number of oxygen vacancies introduced by doping, respectively and  $N_{\text{cation}}$  and  $N_{\text{anion}}$  are the total number of cations or anions.

- $\Delta G_{\text{inter}}$ , which refers to the total change of Gibbs energy due to defect interactions.

Due to charge neutrality and site balance, the constraints  $2N_V = N_{\text{Ce}'}$ ,  $2N_{\text{V,dot}} = N_{\text{dot}}$ , and  $N_V = 2N_{\text{O}_2}$  can be used and the equation rewritten in terms of the number of oxygen vacancies  $N_V$  using the relation  $N_{\text{cation}} = \frac{1}{2} N_{\text{anion}} = N_{\text{CeO}_2}$  and  $\Delta_r g = 2g_{\text{Ce}'} + g_V + 0.5\mu_{\text{O}_2}$ :

$$\begin{aligned}
\Delta G_R &= N_V \cdot \Delta_r g \\
&- k_B T \ln \frac{(N_{\text{CeO}_2})!}{(N_{\text{CeO}_2} - 2N_V - N_{\text{dot}})!(2N_V)! N_{\text{dot}}!} \\
&- k_B T \ln \frac{(2N_{\text{CeO}_2})!}{(2N_{\text{CeO}_2} - N_V - N_{\text{V,dot}})!(N_V + N_{\text{V,dot}})!} \\
&+ k_B T \ln \frac{(N_{\text{CeO}_2})!}{(N_{\text{CeO}_2} - N_{\text{dot}})! N_{\text{dot}}!} + k_B T \ln \frac{(2N_{\text{CeO}_2})!}{(2N_{\text{CeO}_2} - N_{\text{V,dot}})! N_{\text{V,dot}}!} \\
&+ \Delta G_{\text{inter}}
\end{aligned}$$

Minimizing this term with respect to  $N_V$  yields:

$$\begin{aligned}
\frac{\partial \Delta G_R}{\partial N_V} &= \Delta_r g + 2k_B T \ln \frac{2N_V}{N_{\text{CeO}_2} - 2N_V - N_{\text{dot}}} \\
&+ k_B T \ln \frac{N_V}{2N_{\text{CeO}_2} - N_V - N_{\text{V,dot}}} + \frac{\partial \Delta G_{\text{inter}}}{\partial N_V} \stackrel{\text{def}}{=} 0
\end{aligned}$$

Using again the previous constraints and introducing the lattice mole fraction  $\frac{N_{\text{Ce}'}}{N_{\text{CeO}_2}} = [\text{Ce}']$  and

$\frac{N_V}{N_{\text{CeO}_2}} = [\text{V}_{\text{O}}^{\bullet}] = \delta$  leads to:

$$\Delta_r g + 2k_B T \ln \frac{[\text{Ce}'_{\text{Ce}}]}{[\text{Ce}^x_{\text{Ce}}]} + k_B T \ln \frac{[\text{V}_{\text{O}}^{\bullet}]}{[\text{O}_{\text{O}}^x]} + \frac{\partial \Delta_r g^{\text{int}}(T, \delta, N_{\text{dot}})}{\partial \delta} = 0$$

Rearranging results in:

$$\frac{[\text{V}_{\text{O}}^{\bullet}][\text{Ce}'_{\text{Ce}}]^2}{[\text{O}_{\text{O}}^x][\text{Ce}^x_{\text{Ce}}]^2} = \exp\left(-\frac{\Delta_r g}{k_B T}\right) \exp\left(-\frac{\partial \Delta_r g^{\text{int}}}{k_B T \partial \delta}\right)$$

or

$$\frac{[\text{V}_{\text{O}}^{\bullet}][\text{Ce}'_{\text{Ce}}]^2}{[\text{O}_{\text{O}}^x][\text{Ce}^x_{\text{Ce}}]^2} p_{\text{O}_2}^{\frac{1}{2}} = \exp\left(-\frac{\Delta_r g^\circ}{k_B T}\right) \exp\left(-\frac{\partial \Delta_r g^{\text{int}}}{k_B T \partial \delta}\right) = K(T) \cdot K_{\text{int}}(T, \delta)$$

$\Delta_r g^\circ$  is the standard Gibbs energy of reduction and  $\Delta_r g^{\text{int}}$  is the additional contribution per formula unit due to defect interactions. Neglecting volume changes in the solid, the approximation  $\Delta_r g^{\text{int}} \approx \Delta_r f^{\text{int}}$  is applicable and we obtain

$$\frac{[\text{V}_{\text{O}}^{\bullet}][\text{Ce}'_{\text{Ce}}]^2}{[\text{O}_{\text{O}}^x][\text{Ce}^x_{\text{Ce}}]^2} p_{\text{O}_2}^{\frac{1}{2}} = \exp\left(-\frac{\Delta_r g^\circ}{k_B T}\right) \exp\left(-\frac{\partial \Delta_r f^{\text{int}}}{k_B T \partial \delta}\right) = K(T) \cdot K_{\text{int}}(T, \delta)$$

## Calculation of $\Delta_r u^{\text{int}}$ and $\Delta_r f^{\text{int}}$

The Metropolis Monte Carlo algorithm samples a sequence of states in thermodynamic equilibrium with the probability of each state being proportional to the respective Boltzman factor:

$$m \cdot M(E, T) = \Omega(E) \cdot \exp\left(\frac{-E}{k_B T}\right)$$

Here,  $M(E, T)$  is the sampled distribution,  $\Omega(E)$  is the total configurational space, and  $m$  is a proportionality constant. The interaction contribution to the internal energy per formula unit  $u^{\text{int}}$  is then just the average of the sampled states:

$$u^{\text{int}} = \frac{1}{2} \cdot \langle \sum_i \sum_j E_{ij} \rangle_{\text{MCS}} / N_{\text{CeO}_2} = \langle M(E, T) \rangle_E / N_{\text{CeO}_2}$$

The contribution to the internal energy of reduction  $\Delta_r u^{\text{int}}$  is given by the difference between stoichiometric and non-stoichiometric composition.

However, as only a small part of the configurational space is sampled and the proportionality constant  $m$  is not known, the direct evaluation of the partition function and the free energy is not possible.

This problem is circumvented with the approach by Valleau and Card<sup>1</sup> where the sampled distribution  $M(E, T_{\text{min}})$  is connected to the random, non-interacting distribution  $\Omega^*(E)$  by a series of bridging distributions. The bridging distributions are defined by their temperatures that are given by the factor  $\alpha = T_{\text{min}}/T$ . For  $\alpha = 1$  the desired distribution is obtained and for  $\alpha = 0$  the random distribution is sampled. From the overlap of subsequent distributions, the individual factor  $m'_i$  can be obtained and the free energy of interaction, i.e. the difference between the interacting and the non-interacting system can be calculated from:

$$F_{\text{int}} = -k_B T \cdot \sum \ln(m'_i)$$

The contribution to the free energy of reduction  $\Delta_r f^{\text{int}}$  is given by the difference between stoichiometric and non-stoichiometric composition.

## Energy parameters

Pair interaction energies were taken from refs.<sup>2,3</sup>. These energies were calculated with DFT+U using the PBE functional and  $U_{\text{eff}} = 5$  eV.

### Trivalent Cation interactions

Table 1: Pair interactions for trivalent cations in eV.

| RE <sup>3+</sup> | RE' <sub>Ce</sub> - V <sub>O</sub> <sup>••</sup> 1NN | RE' <sub>Ce</sub> - V <sub>O</sub> <sup>••</sup> 2NN | RE' <sub>Ce</sub> - Ce' <sub>Ce</sub> 1NN |
|------------------|------------------------------------------------------|------------------------------------------------------|-------------------------------------------|
| Sc               | -0.75                                                | -0.22                                                | 0.1                                       |
| Lu               | -0.48                                                | -0.12                                                | 0.1                                       |
| Y                | -0.35                                                | -0.14                                                | 0.1                                       |
| Gd               | -0.29                                                | -0.13                                                | 0.1                                       |
| Sm               | -0.24                                                | -0.14                                                | 0.1                                       |
| Nd               | -0.18                                                | -0.17                                                | 0.1                                       |
| Ce               | -0.14                                                | -0.19                                                | 0.1                                       |
| La               | -0.12                                                | -0.20                                                | 0.1                                       |

## Vacancy-vacancy interactions

Table 2: Pair interactions between two vacancies, depending on the distance. 3 NN(a) and 3 NN(b) differentiate interactions without and with a cation position between the vacancies.

| Neighbor position | interaction / eV |
|-------------------|------------------|
| 1 NN              | 0.90             |
| 2 NN              | 0.33             |
| 3 NN(a)           | 0.32             |
| 3 NN(b)           | 0.46             |
| 4 NN              | 0.34             |

## Zirconium ion interactions

Table 3: Interactions for defect pairs containing zirconium ions in ceria.

| Defect pair                                                                 | interaction / eV |
|-----------------------------------------------------------------------------|------------------|
| $\text{Zr}_{\text{Ce}}^{\times} - \text{V}_{\text{O}}^{\bullet\bullet}$ 1NN | -0.6             |
| $\text{Zr}_{\text{Ce}}^{\times} - \text{V}_{\text{O}}^{\bullet\bullet}$ 2NN | -0.05            |
| $\text{Zr}_{\text{Ce}}^{\times} - \text{Zr}_{\text{Ce}}^{\times}$ 1NN       | -0.01            |
| $\text{Zr}_{\text{Ce}}^{\times} - \text{Y}'_{\text{Ce}}$ 1NN                | 0.0              |
| $\text{Zr}_{\text{Ce}}^{\times} - \text{Gd}'_{\text{Ce}}$ 1NN               | 0.0              |
| $\text{Zr}_{\text{Ce}}^{\times} - \text{Ce}'_{\text{Ce}}$ 1NN               | 0.0              |

## References

1. J. P. Valleau, *The Journal of Chemical Physics*, 1972, **57**, 5457.
2. S. Grieshammer, M. Nakayama and M. Martin, *Phys. Chem. Chem. Phys.*, 2016, **18**, 3804–3811.
3. S. Grieshammer, *J Phys Chem C*, 2017, **121**, 15078-15084.
